# Supplementary material for: Mitochondrial dynamics controls anti-tumour innate immunity by regulating CHIP-IRF1 axis stability
Source: PubMed Central journal article supplement (PMC5703766; doi:10.1038/s41467-017-01919-0), 2017-11-27
Supplement: 41467_2017_1919_MOESM3_ESM.pdf [file 41467_2017_1919_MOESM3_ESM.pdf]

## **Description of Additional Supplementary Files**

File Name: Supplementary Data 1

Description: We isolated CD4<sup>+</sup> Naïve T cells (CD4<sup>+</sup> CD44<sup>-</sup> CD62L<sup>high</sup>) from the spleens of WT and Fam73b<sup>fl/fl</sup>-CD4<sup>cre</sup> mice. The Gene expression was performed by RNAseq analysis.

File Name: Supplementary Data 2

Description: We isolated total bone marrow cells from WT and Fam73b-KO mice. The bone marrow-derived macrophages (BMDMs) were generated by M-CSF. After 5 days, BMDMs were starved for 12 hours and treated with LPS for other 6 hours. The Gene expression of nontreatment or LPS-induced groups was performed by RNAseq analysis.
